# Supplementary material for: Exposure to a combination of silica nanoparticles and low-dose radiation aggravates lung fibrosis in mice via gut microbiota modulation
Source: Royal Society of Chemistry journal article supplement (doi:10.1039/d0en01021a), 2020-01-01
Supplement: d0en01021a3.pdf [file d0en01021a3.pdf]

Table S1 Hydrodynamic sizes in distilled water were detected in different timepoints

| Time | Hydrodynamic sizes(nm) |
|------|------------------------|
| 0h   | 112.56±5.95            |
| 3h   | 113.49±4.67            |
| 6h   | 112.01±3.67            |
| 12h  | 112.92±4.51            |
| 24h  | 113.22±4.63            |
