# Supplementary figures and images for: Exposure to a combination of silica nanoparticles and low-dose radiation aggravates lung fibrosis in mice via gut microbiota modulation
Source: Royal Society of Chemistry journal article supplement (doi:10.1039/d0en01021a), 2020-01-01

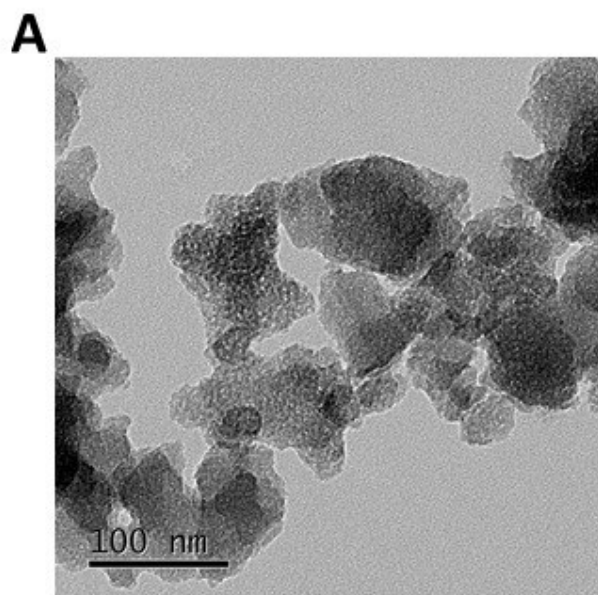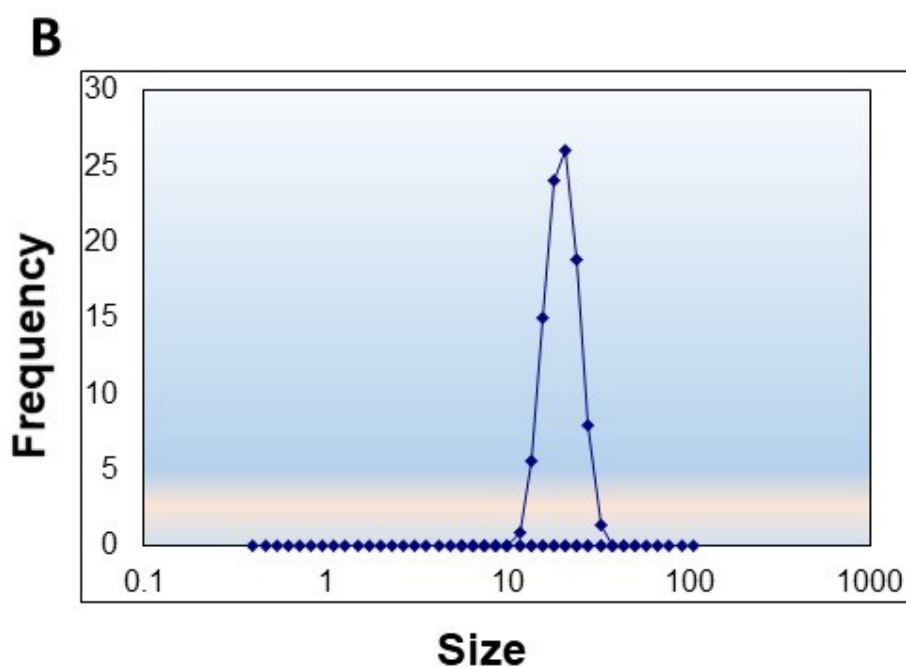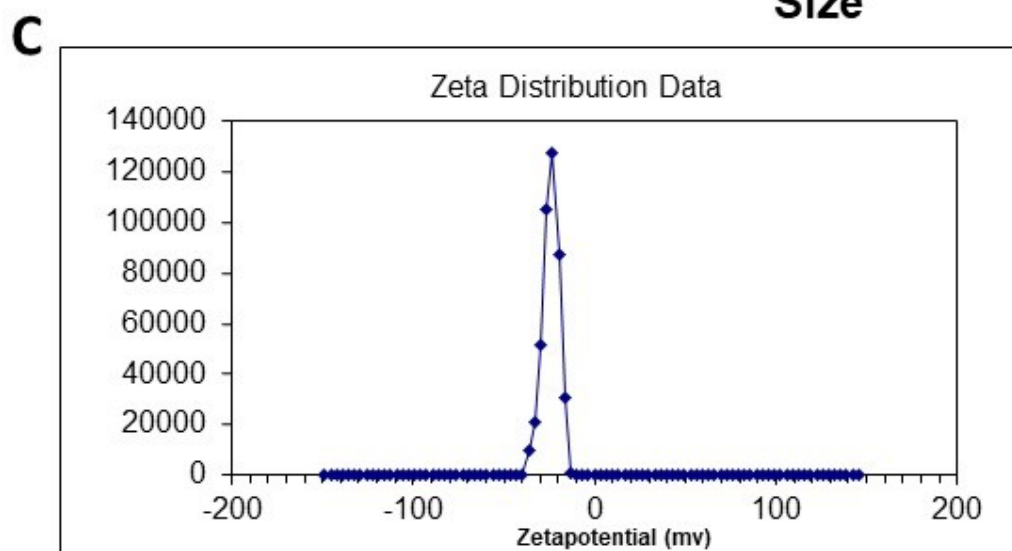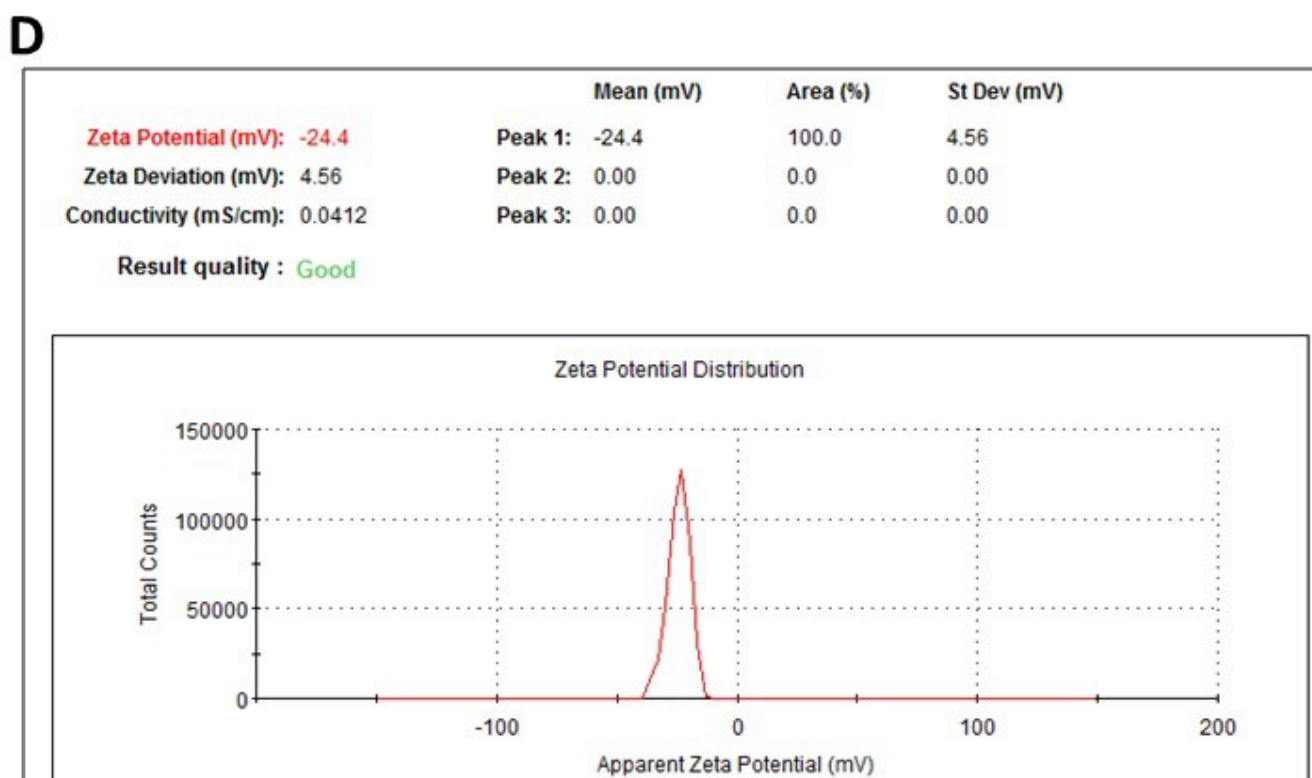

Supplement: d0en01021a1.pdf [file d0en01021a1.pdf]

### HBE E-cadherin

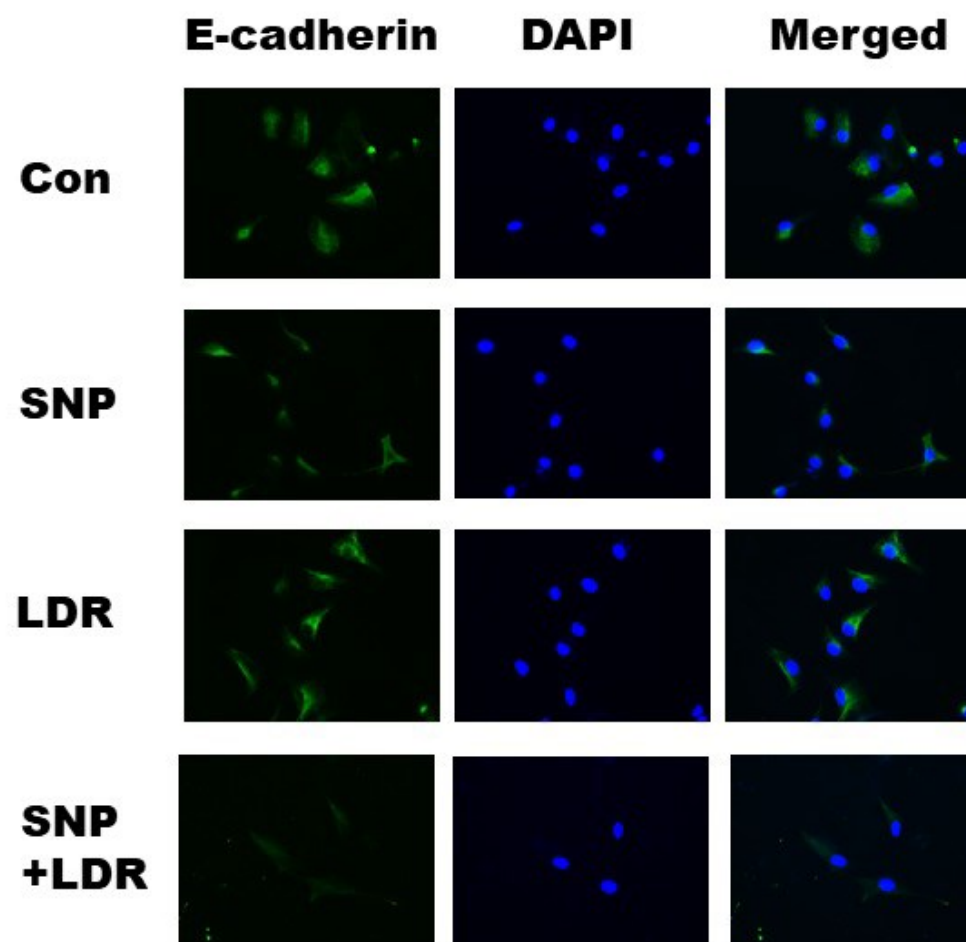

### HBE N-cadherin

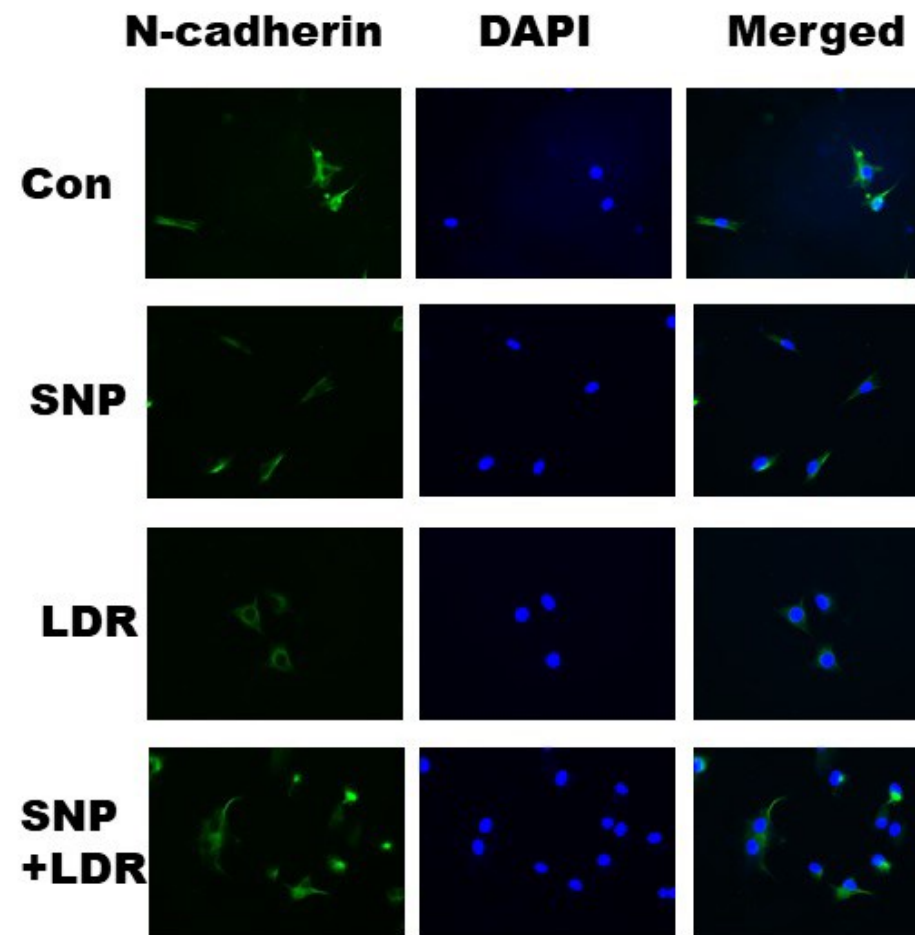

Supplement: d0en01021a2.pdf [file d0en01021a2.pdf]
